# Supplementary material
Source: publisher figshare collection journal article supplement (https://karger.figshare.com/articles/dataset/_/5240878)
Supplement: Supplementary file 1 [file 1]

Archive with 3 entries (3 files):
- NDD477937_S1.tiff
- NDD477937_S2.tiff
- NDD477937_S3.pdf
