# Supplementary material
Source: publisher figshare collection journal article supplement (https://karger.figshare.com/articles/dataset/_/5240878)
Supplement: Supplementary file 1 [file 1 › NDD477937_S3.pdf]

**Table S1. Correlation of GSAP frontal cortex and hippocampus values with cognitive measurements across clinical groups**

|                         | 16 kDa GSAP FC    | 98 kDa GSAP FC     | 16 kDa GSAP HP   | 98 kDa GSAP HP    |
|-------------------------|-------------------|--------------------|------------------|-------------------|
| Global Cognitive scores | -0.20<br>p = 0.26 | -0.40<br>p = 0.02  | 0.23<br>p = 0.22 | 0.26<br>p = 0.16  |
| Episodic Memory         | -0.31<br>p = 0.08 | -0.51<br>p = 0.003 | 0.20<br>p = 0.30 | 0.13<br>p = 0.5   |
| MMSE*                   | 0.16<br>p = 0.32  | -0.41<br>p = 0.008 | 0.16<br>p = 0.34 | -0.40<br>p = 0.01 |

\*sAD group was included in the correlations with MMSE

FC: frontal cortex; HP: hippocampus
