# Supplementary material
Source: publisher figshare collection journal article supplement (https://karger.figshare.com/articles/dataset/_/5240878)

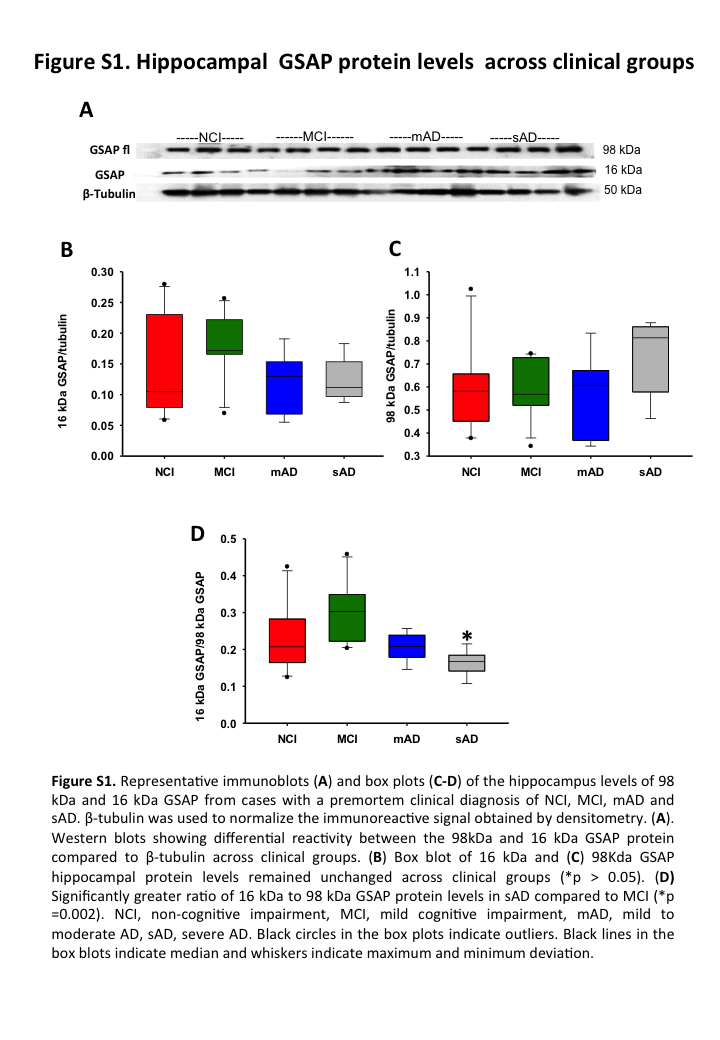

Supplement: Supplementary file 1 [file 1 › NDD477937_S1.tiff]

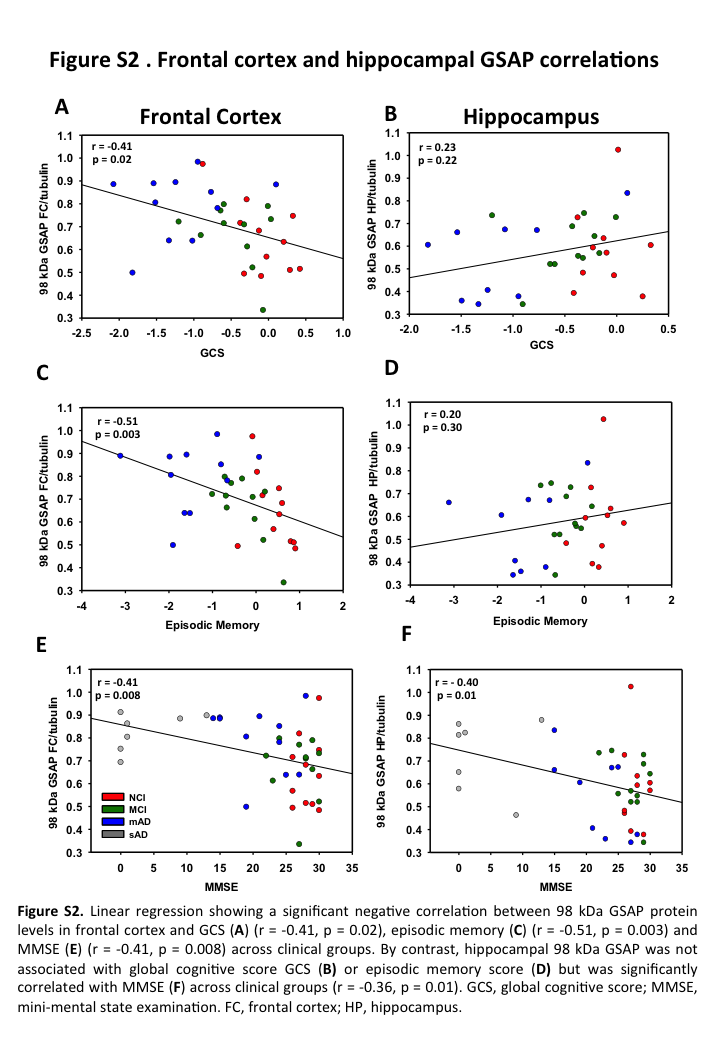

Supplement: Supplementary file 1 [file 1 › NDD477937_S2.tiff]
